# Supplementary material
Source: PubMed Central journal article supplement (PMC8085092)

# Figure 5D

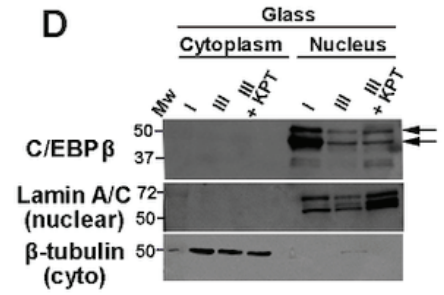

| Cytoplasm |     |      | Nucleus |     |      | Cytoplasm |     |      | Nucleus |     |      |
|-----------|-----|------|---------|-----|------|-----------|-----|------|---------|-----|------|
| I         | III | III+ | I       | III | III+ | I         | III | III+ | I       | III | III+ |

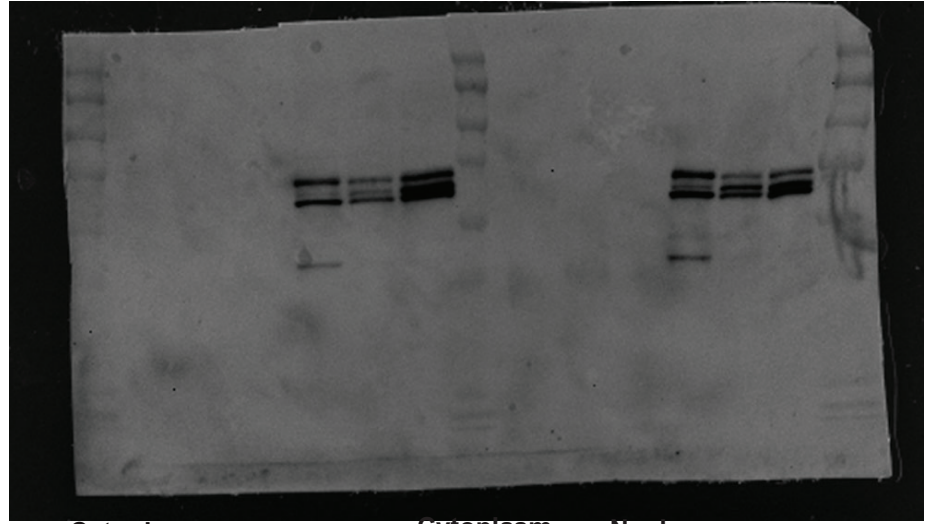

| Cytoplasm |     |      | Nucleus |     |      | Cytoplasm |     |      | Nucleus |     |      |
|-----------|-----|------|---------|-----|------|-----------|-----|------|---------|-----|------|
| I         | III | III+ | I       | III | III+ | I         | III | III+ | I       | III | III+ |

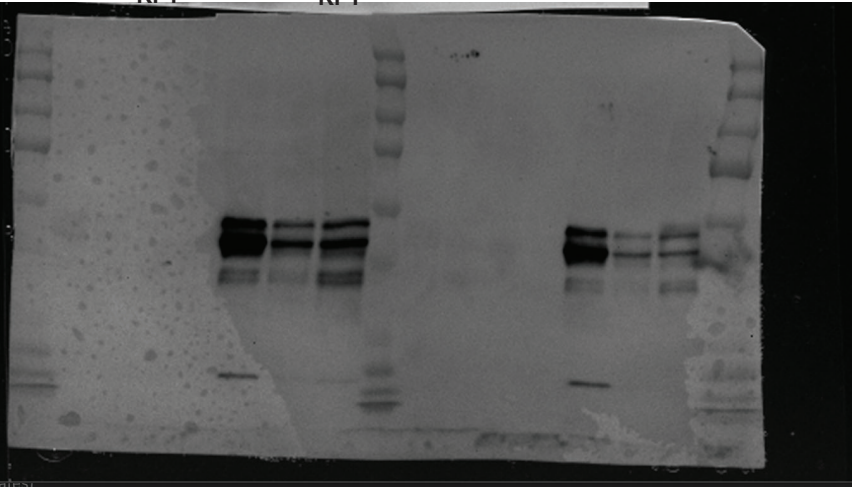

| Cytoplasm |     |      | Nucleus |     |      | Cytoplasm |     |      | Nucleus |     |      |
|-----------|-----|------|---------|-----|------|-----------|-----|------|---------|-----|------|
| I         | III | III+ | I       | III | III+ | I         | III | III+ | I       | III | III+ |

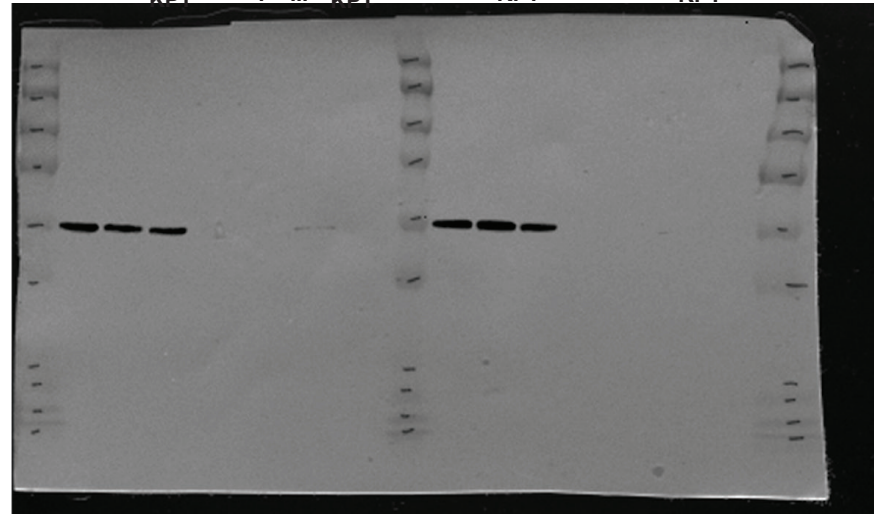

# Figure 5F

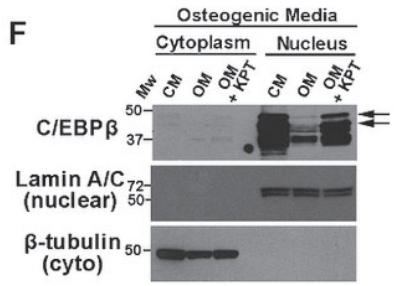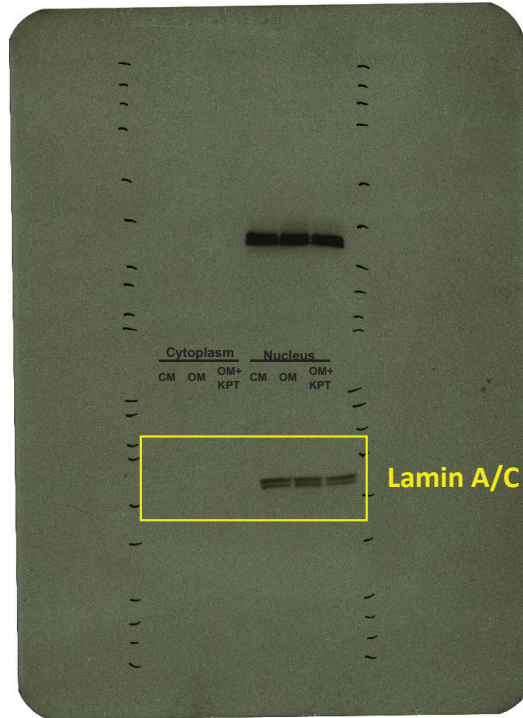

Lamin A/C

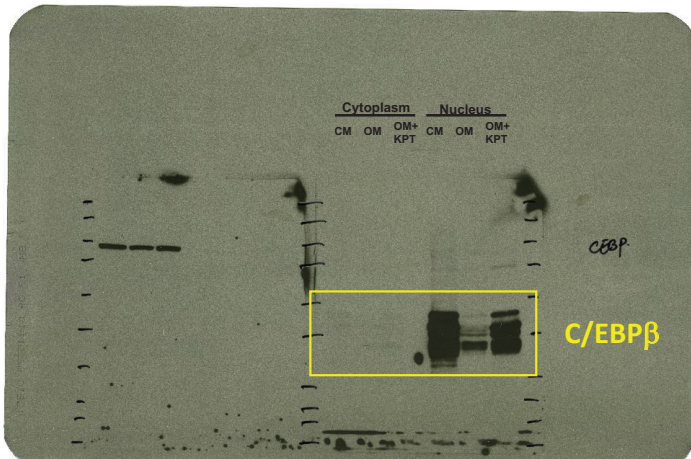

C/EBP $\beta$

$\beta$ Tubulin

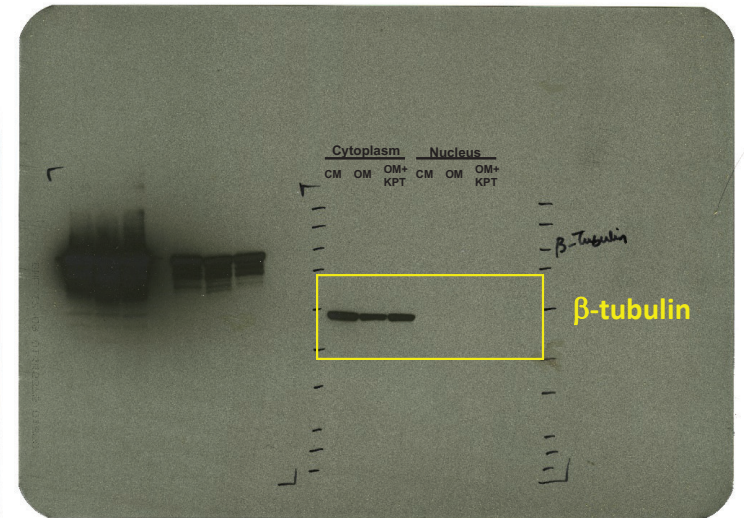



# Figure 5H

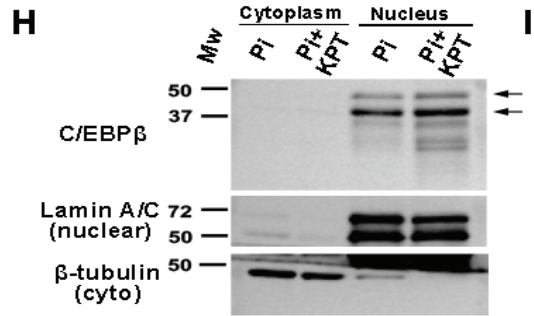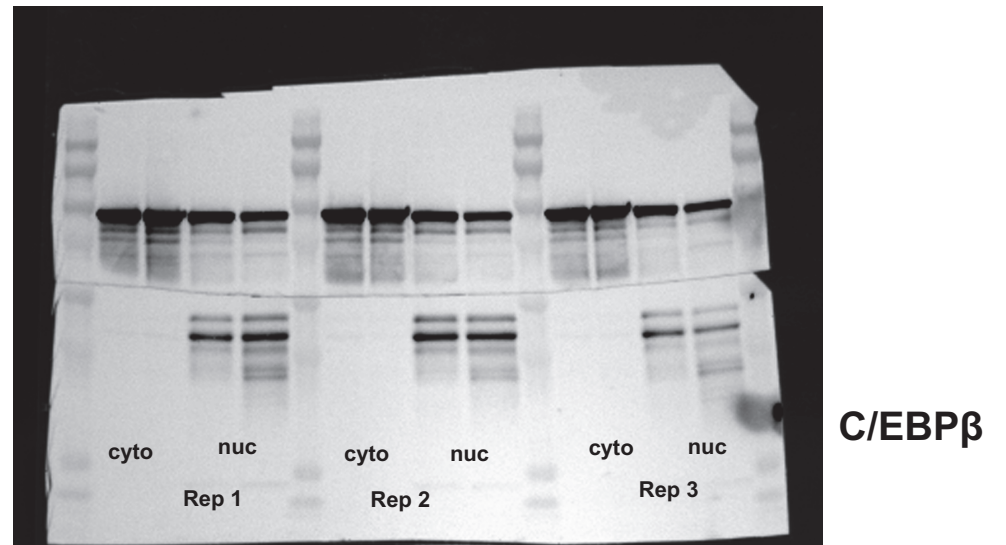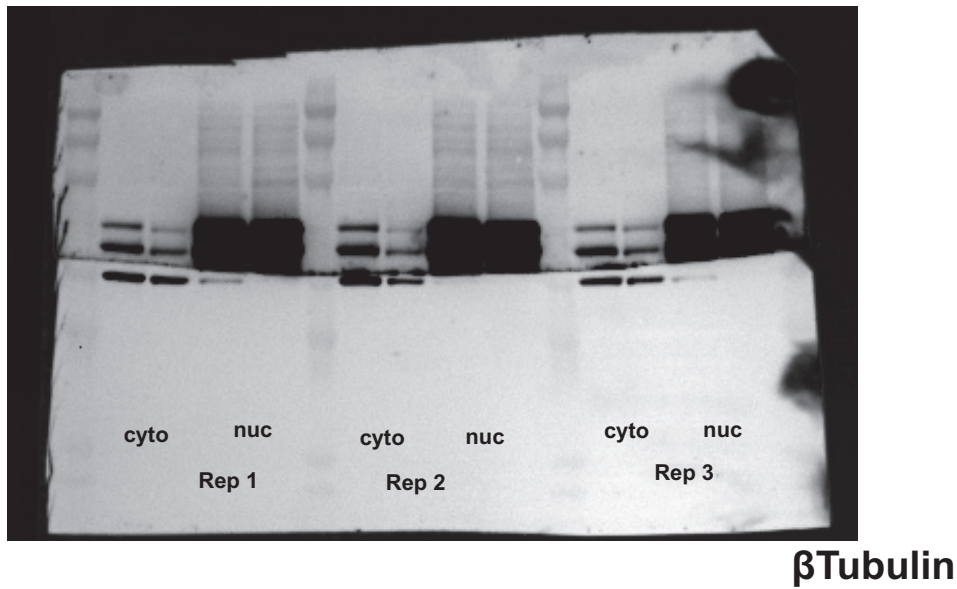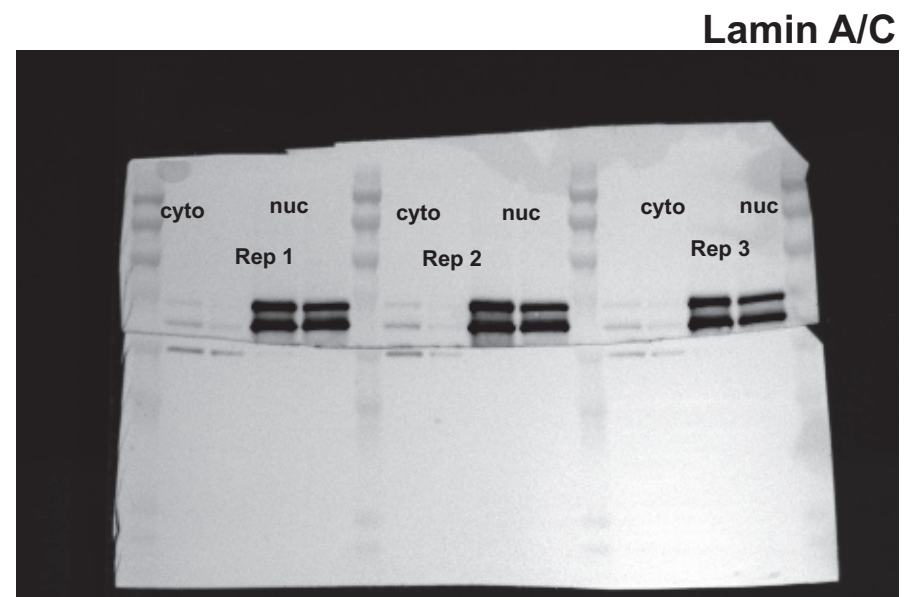

# Figure 5J

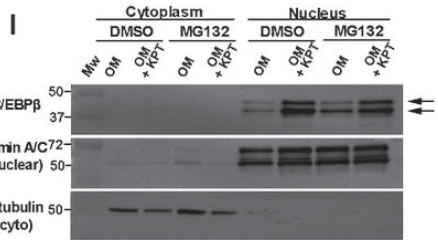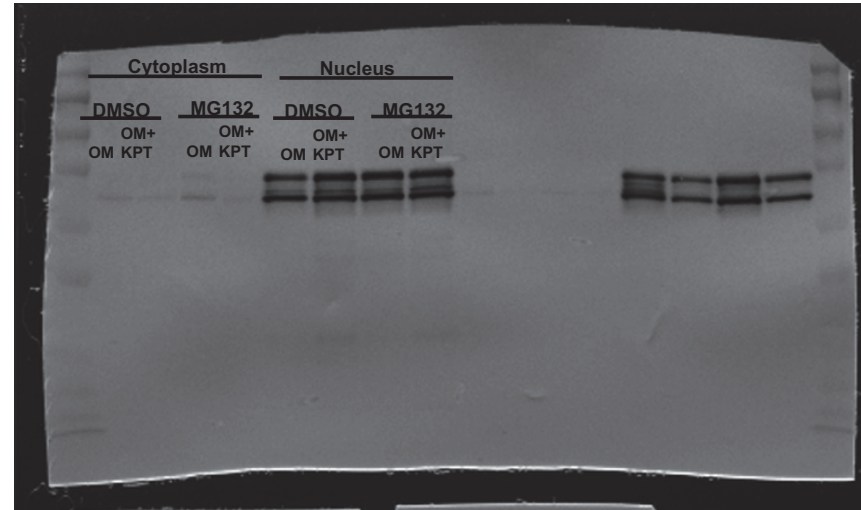

Lamin A/C

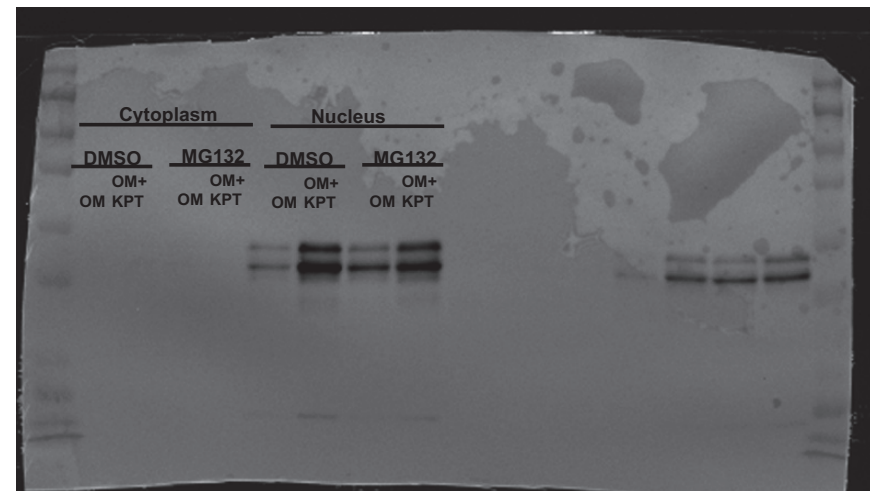

C/EBP $\beta$

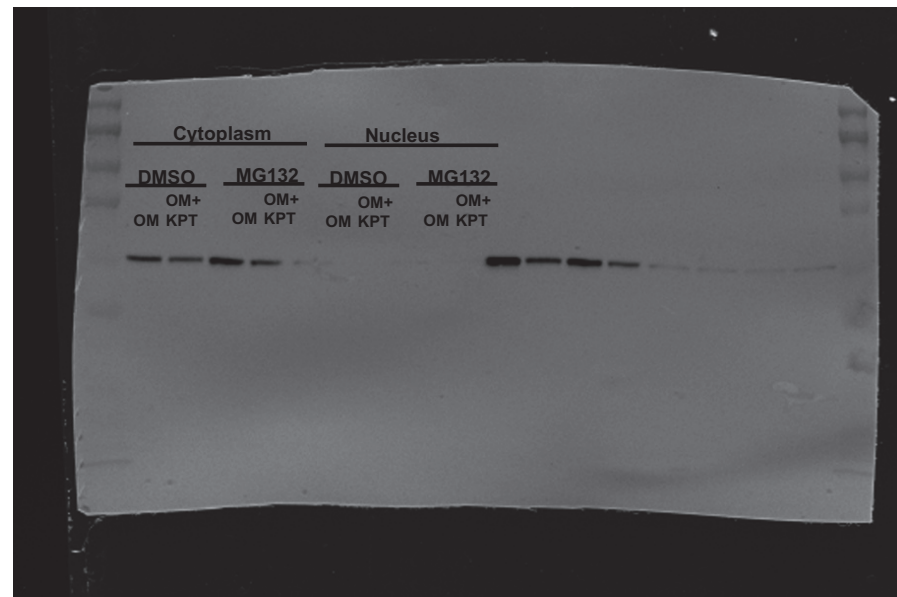

βTubulin

# Figure 6A

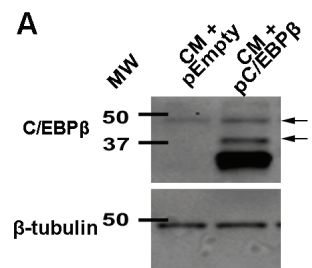

C/EBPβ

βTubulin

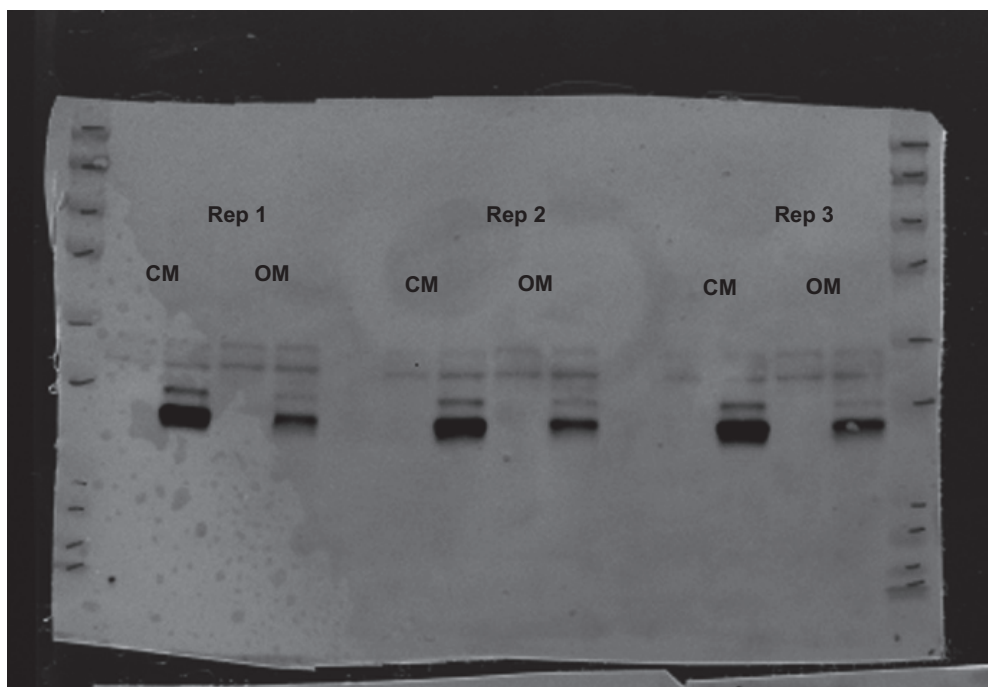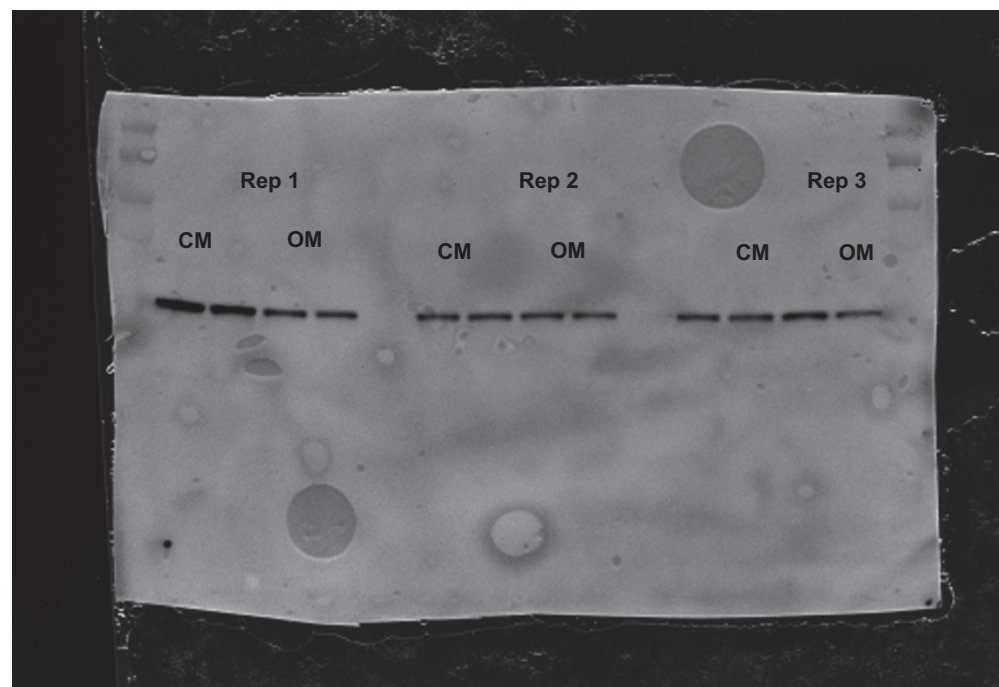

# Figure 6G

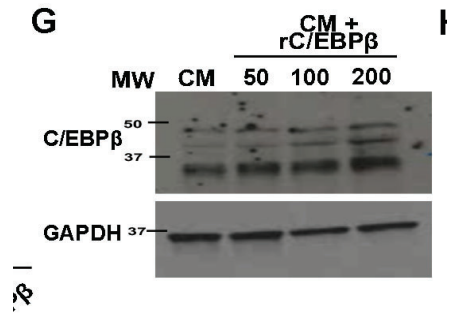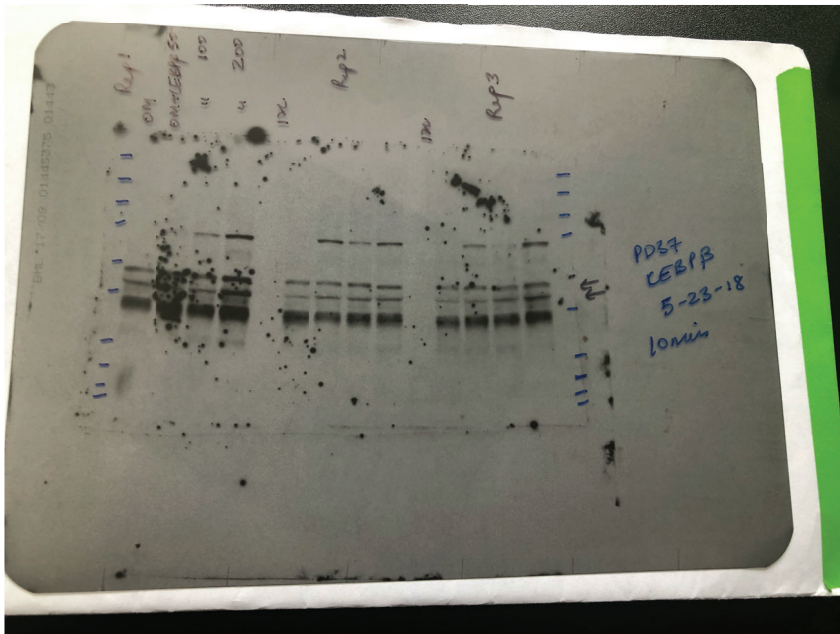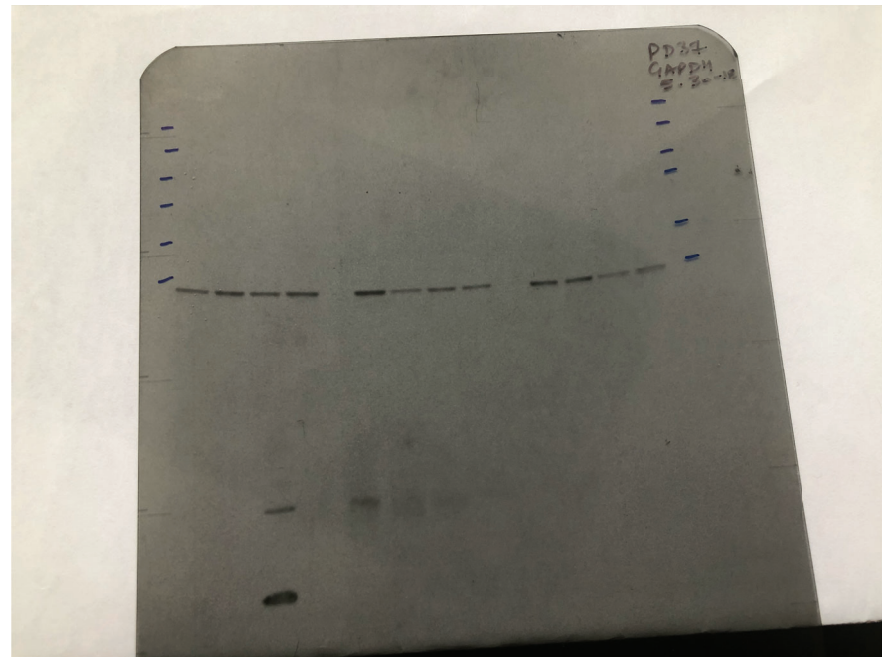



# Figure 7B

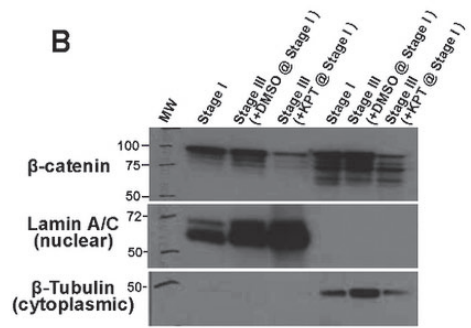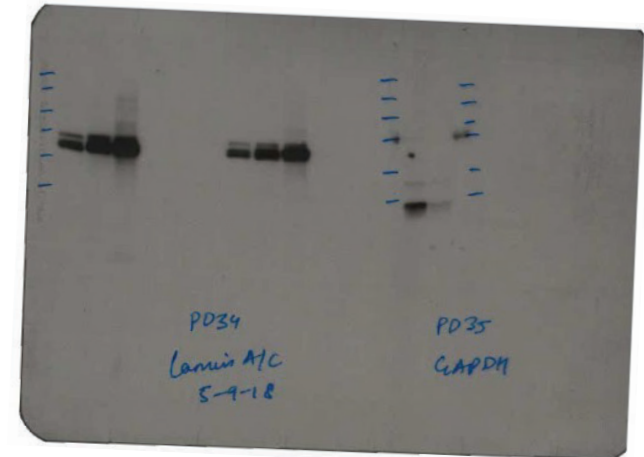

Lamin A/C

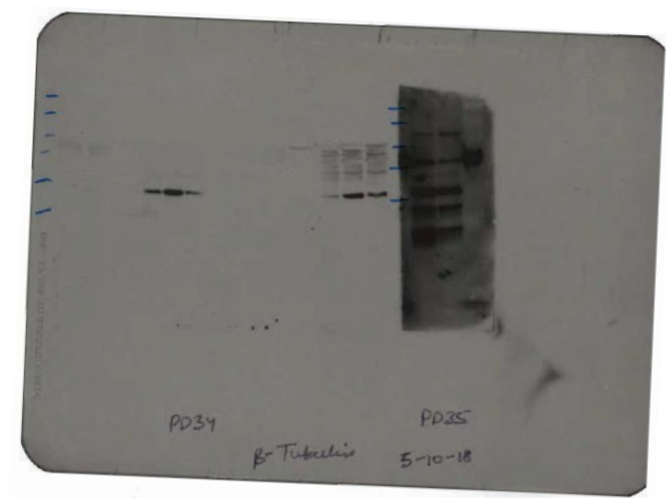

βTubulin

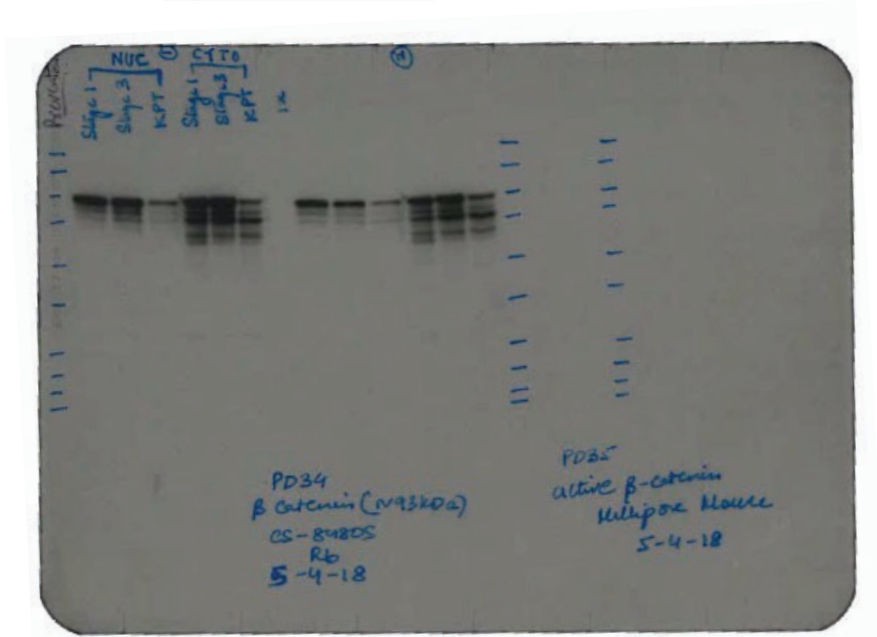

β-Catenin

# Figure 7D

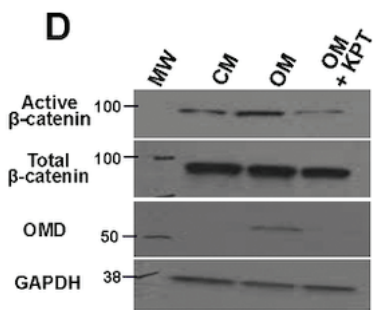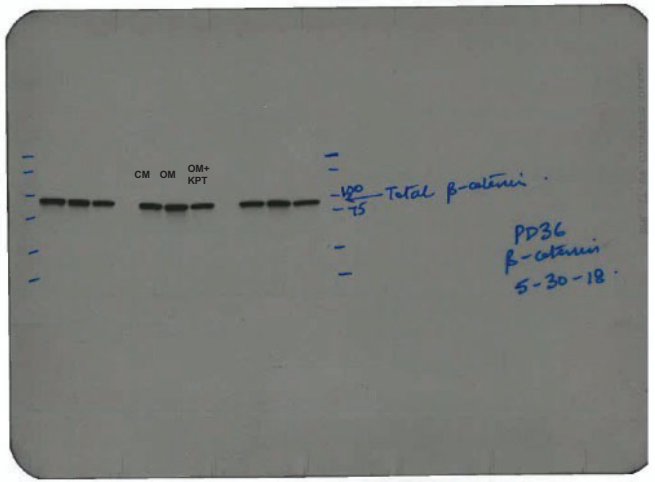

Total β-Catenin

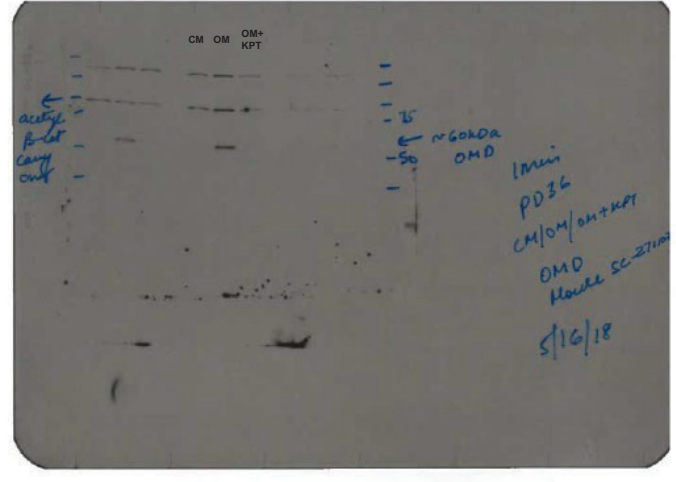

OMD

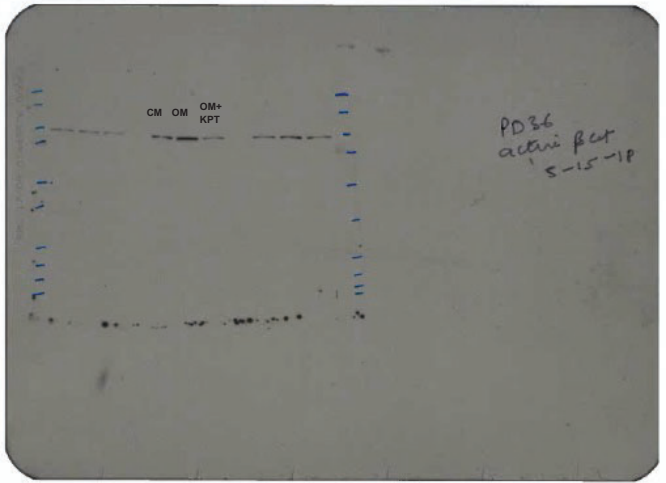

Active β-Catenin

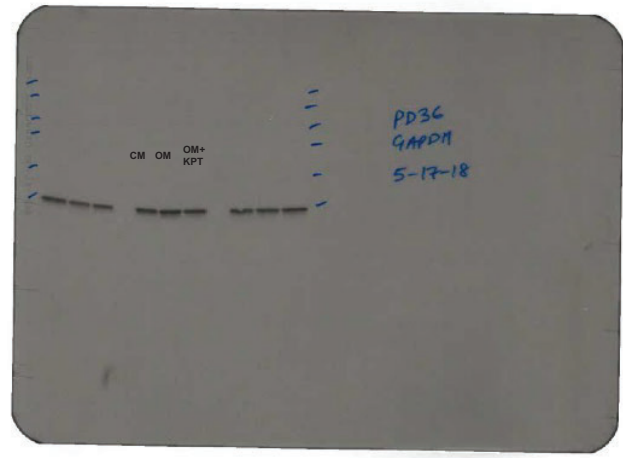

GAPDH



# Figure 7I

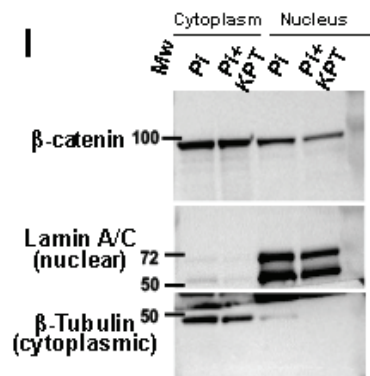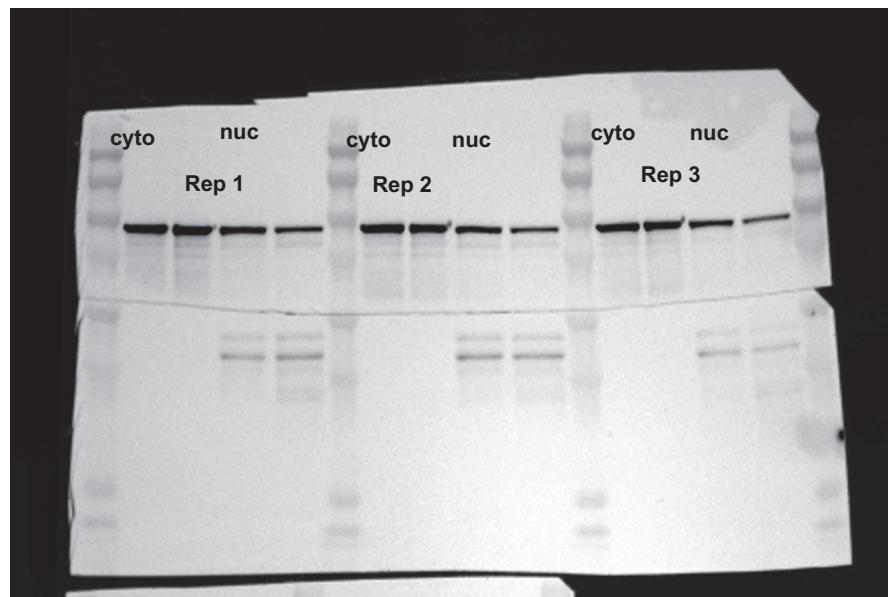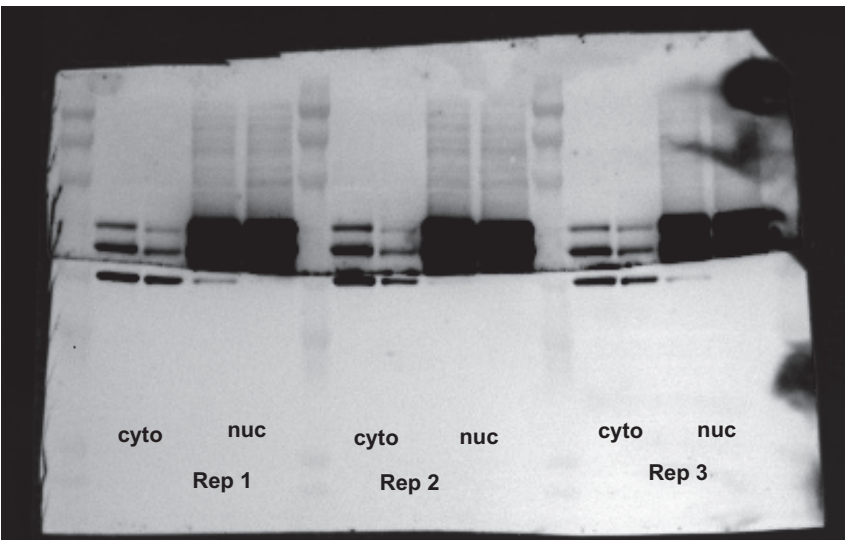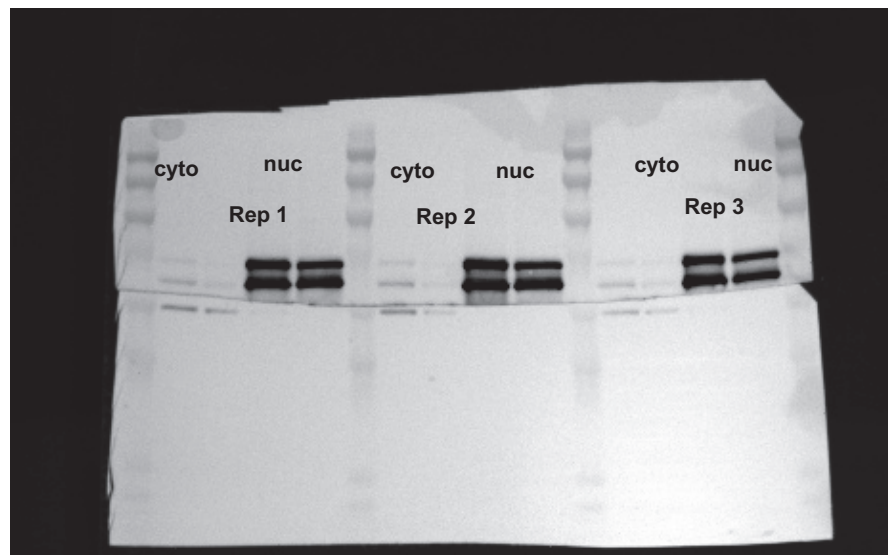

# Figure 8A

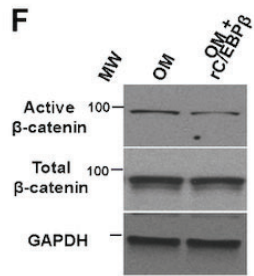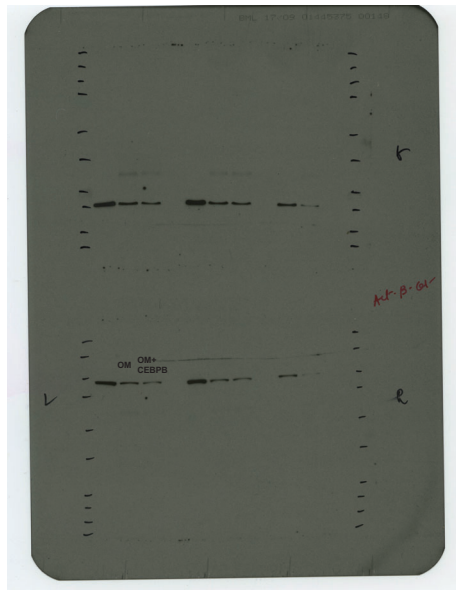

**Active  $\beta$ -Catenin**

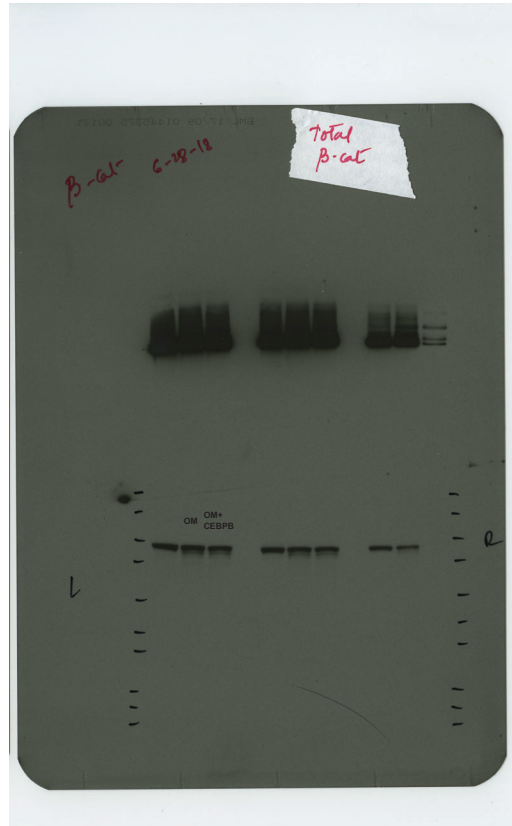

**Total  $\beta$ -Catenin**

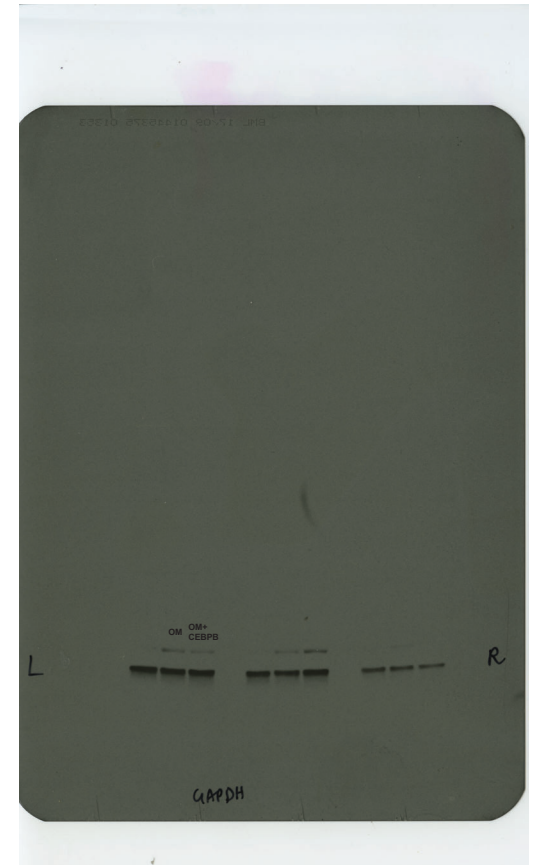

**GAPDH**

# Figure 8C

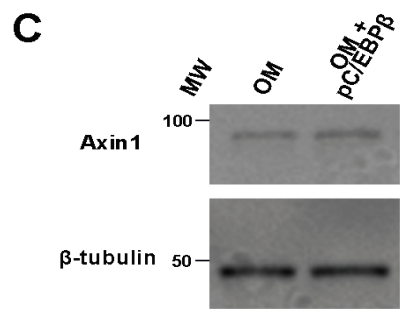

**AXIN 1**

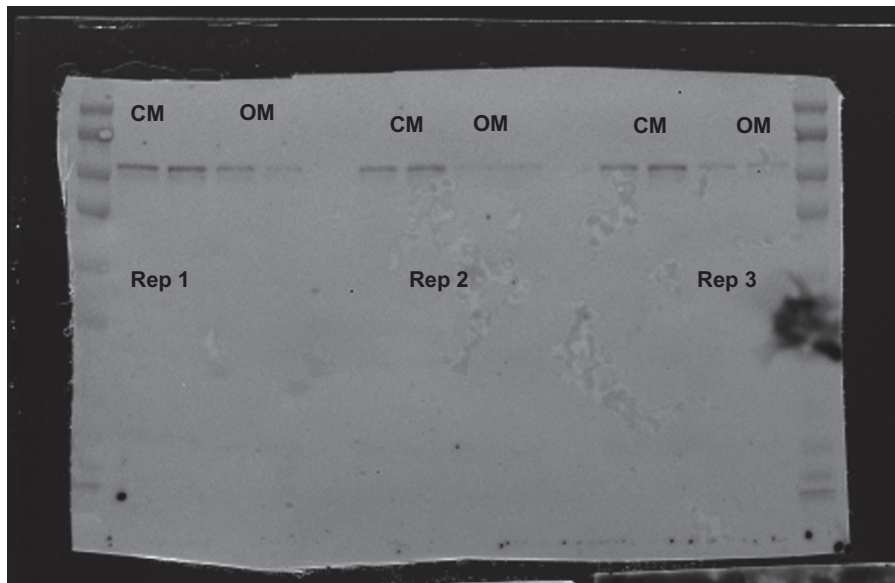

**βTubulin**

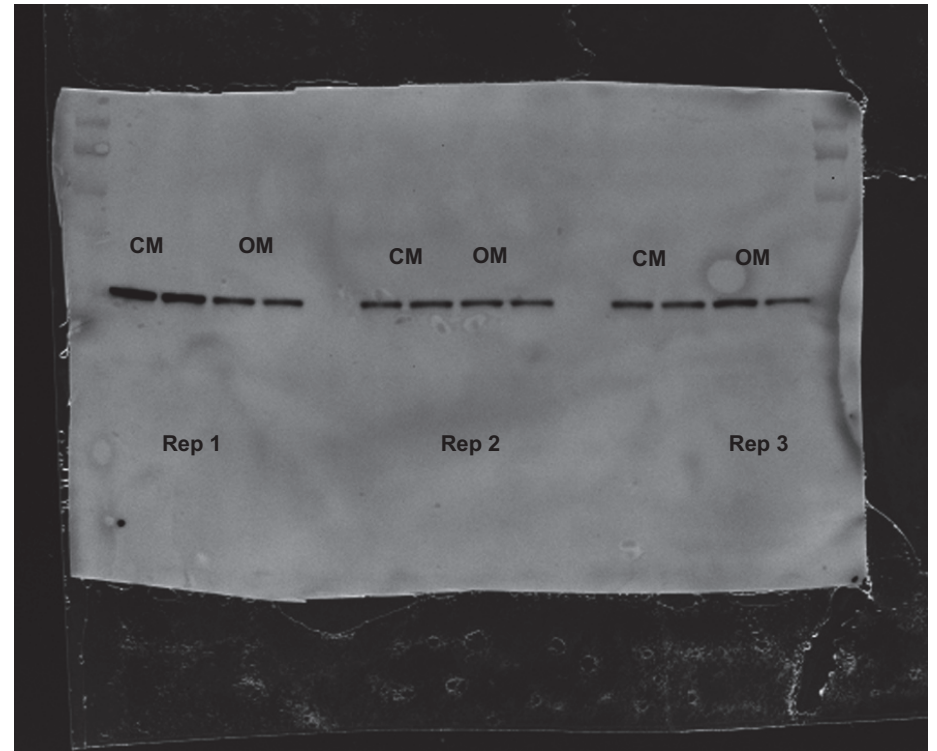

Supplement: NIHMS1675999-supplement-318503_Uncut_Gel_Blots.pdf [file NIHMS1675999-supplement-318503_Uncut_Gel_Blots.pdf]
