# Supplementary material
Source: PubMed Central journal article supplement (PMC8085092)
Supplement: NIHMS1675999-supplement-318503_Major_Resources_Table.pdf [file NIHMS1675999-supplement-318503_Major_Resources_Table.pdf]

## Major Resources Table

In order to allow validation and replication of experiments, all essential research materials listed in the Methods should be included in the Major Resources Table below. Authors are encouraged to use public repositories for protocols, data, code, and other materials and provide persistent identifiers and/or links to repositories when available. Authors may add or delete rows as needed.

### Animals (in vivo studies)

| Species | Vendor or Source | Background Strain       | Sex  | Persistent ID / URL |
|---------|------------------|-------------------------|------|---------------------|
| Klotho  | MMRCC            | B6;129S5-Kltm1Lex/Mmucd | M, F |                     |
|         |                  |                         |      |                     |
|         |                  |                         |      |                     |

### Genetically Modified Animals

|                 | Species | Vendor or Source | Background Strain | Other Information | Persistent ID / URL |
|-----------------|---------|------------------|-------------------|-------------------|---------------------|
| Parent - Male   |         |                  |                   |                   |                     |
| Parent - Female |         |                  |                   |                   |                     |

### Antibodies

| Target antigen                             | Vendor or Source  | Catalog # | Working concentration | Lot # (preferred but not required) | Persistent ID / URL |
|--------------------------------------------|-------------------|-----------|-----------------------|------------------------------------|---------------------|
| $\beta$ -Catenin (IF)                      | Abcam             | ab16051   | 1:200                 |                                    |                     |
| Sclerostin (IF)                            | Abcam             | ab85799   | 1:50                  |                                    |                     |
| Runx2 (IF)                                 | Santa Cruz        | sc-10758  | 1:200                 |                                    |                     |
| Osteomodulin (IF)                          | Santa Cruz        | sc-271102 | 1:100                 |                                    |                     |
| Osteopontin (IF)                           | Santa Cruz        | sc-10593  | 1:100                 |                                    |                     |
| Cadherin-11 (IF)                           | Thermo Scientific | #71-7600  | 1:400                 |                                    |                     |
| pHH3 (IF)                                  | Millipore         | #06-570   | 1:300                 |                                    |                     |
| C/EBP $\beta$ (IF)                         | Abcam             | ab53138   | 1:50                  |                                    |                     |
| GAPDH (western blotting)                   | Cell Signaling    | #2118S    | 1:2000                |                                    |                     |
| Osteomodulin (western blotting)            | Santa Cruz        | sc-271102 | 1:1000                |                                    |                     |
| Active $\beta$ -Catenin (western blotting) | Millipore         | #05-665   | 1:500                 |                                    |                     |
| $\beta$ -Catenin (western blotting)        | Cell Signaling    | #8480S    | 1:500                 |                                    |                     |
| C/EBP $\beta$ (western blotting)           | Santa Cruz        | sc-7962   | 1:500                 |                                    |                     |
| AXIN1 (western blotting)                   | Cell Signaling    | #2087S    | 1:500                 |                                    |                     |
| XPO1/CRM1 (western blotting)               | Santa Cruz        | sc-74454  | 1:500                 |                                    |                     |
| Lamin A/C (western blotting)               | Cell Signaling    | #4777S    | 1:1000                |                                    |                     |
| $\beta$ -Tubulin (western blotting)        | Cell Signaling    | #2128S    | 1:1000                |                                    |                     |

### DNA/cDNA Clones

| Clone Name | Sequence | Source / Repository | Persistent ID / URL |
|------------|----------|---------------------|---------------------|
|------------|----------|---------------------|---------------------|

DOI [to be added]

|  |  |  |  |
|--|--|--|--|
|  |  |  |  |
|  |  |  |  |
|  |  |  |  |

**Cultured Cells**

| Name | Vendor or Source | Sex (F, M, or unknown) | Persistent ID / URL |
|------|------------------|------------------------|---------------------|
|      |                  |                        |                     |
|      |                  |                        |                     |
|      |                  |                        |                     |

**Data & Code Availability**

| Description | Source / Repository | Persistent ID / URL |
|-------------|---------------------|---------------------|
|             |                     |                     |
|             |                     |                     |
|             |                     |                     |

**Other**

| Description | Source / Repository | Persistent ID / URL |
|-------------|---------------------|---------------------|
|             |                     |                     |
|             |                     |                     |
|             |                     |                     |
